# Supplementary material for: A new dipeptide as a selective gelator of Cu(ii), Zn(ii), and Pb(ii)
Source: Royal Society of Chemistry journal article supplement (doi:10.1039/d0ce01199a), 2020-01-01
Supplement: d0ce01199a1.pdf [file d0ce01199a1.pdf]

## Supporting information

### A new dipeptide as selective gelator of Cu(II), Zn(II) and Pb(II)

Santosh Kumar,<sup>a</sup> Sujay Kumar Nandi,<sup>a</sup> Saurav Suman<sup>a</sup> and Debasish Halder<sup>\*a</sup>

Department of Chemical Sciences

Indian Institute of Science Education and Research Kolkata

Mohanpur 741246, West Bengal, India

E-mail: [deba\\_h76@iiserkol.ac.in](mailto:deba_h76@iiserkol.ac.in), [deba\\_h76@yahoo.com](mailto:deba_h76@yahoo.com).

## Table of contents

|                                               |    |
|-----------------------------------------------|----|
| <i>1. Supporting information Figure S1</i>    | 3  |
| <i>2. Supporting information Figure S2</i>    | 3  |
| <i>3. Supporting information Figure S3</i>    | 4  |
| <i>4. Supporting information Figure S4</i>    | 4  |
| <i>5. Supporting information Figure S5</i>    | 5  |
| <i>6. Supporting information Figure S6</i>    | 5  |
| <i>7. Supporting information Figure S7</i>    | 6  |
| <i>8. Supporting information Figure S8</i>    | 6  |
| <i>9. Supporting information Figure S9</i>    | 7  |
| <i>10. Supporting information Figure S10</i>  | 7  |
| <i>11. Supporting information Figure S11</i>  | 8  |
| <i>12. Supporting information Figure S12</i>  | 8  |
| <i>13. Supporting information Figure S13</i>  | 9  |
| <i>142. Supporting information Figure S14</i> | 9  |
| <i>15. Supporting information Figure S15</i>  | 10 |
| <i>16. Supporting information Figure S16</i>  | 10 |
| <i>17. Supporting information Figure S17</i>  | 11 |
| <i>18. Supporting information Figure S18</i>  | 11 |

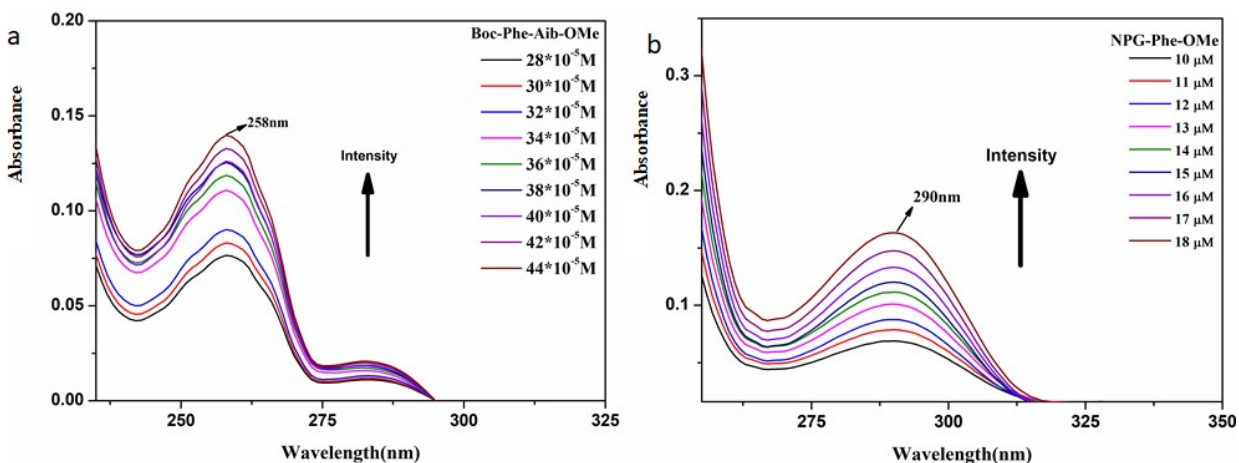

**Fig. S1.** Absorption spectra of (a) peptide 2 and (b) peptide 3 with increasing concentrations.

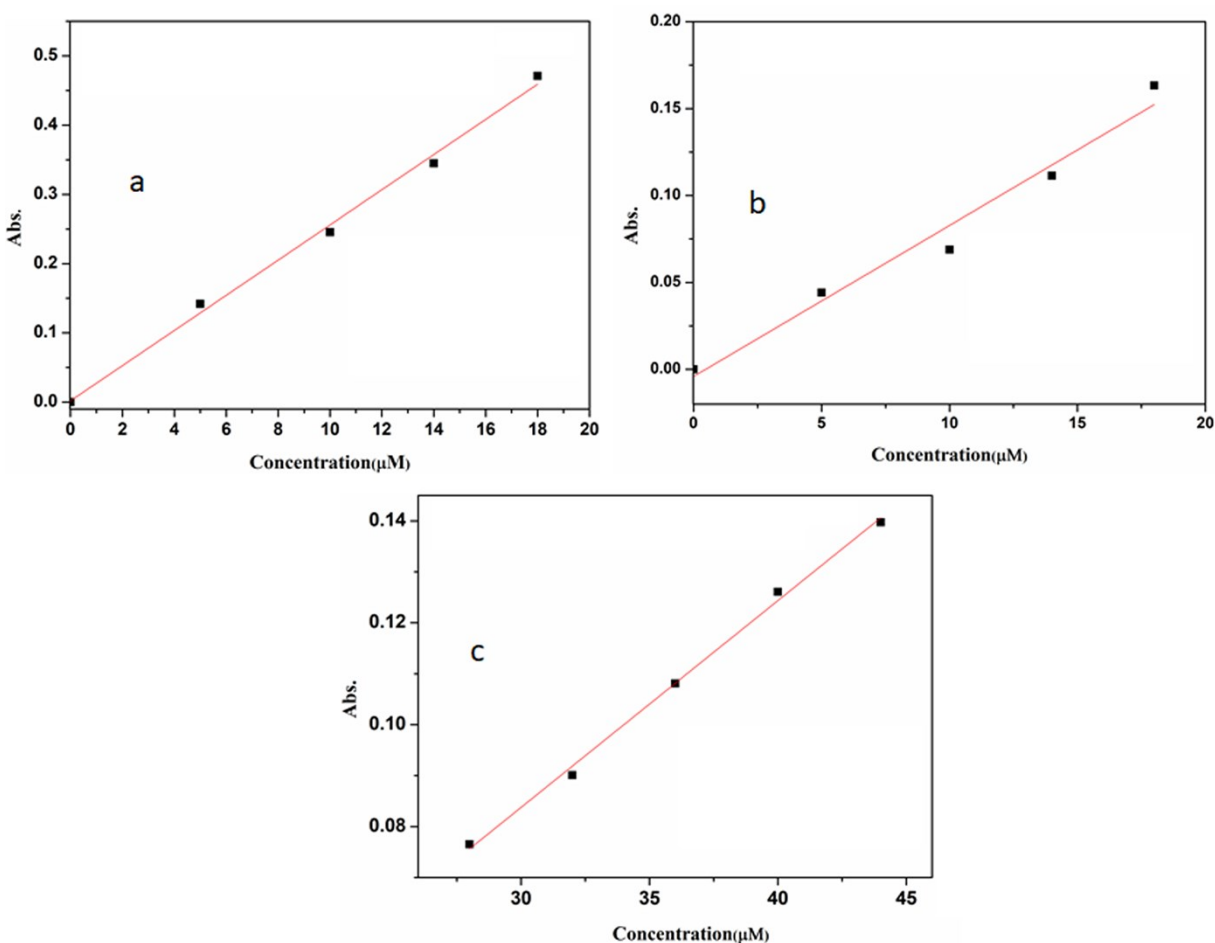

**Fig. S2.** Plots of the key absorbance intensities as a function of concentration of (a) peptide 2 at 259nm, (b) peptide 3 at 290nm and (c) peptide 4 at 282nm. The linear fitting show that the Beer-Lambert behavior have observed.

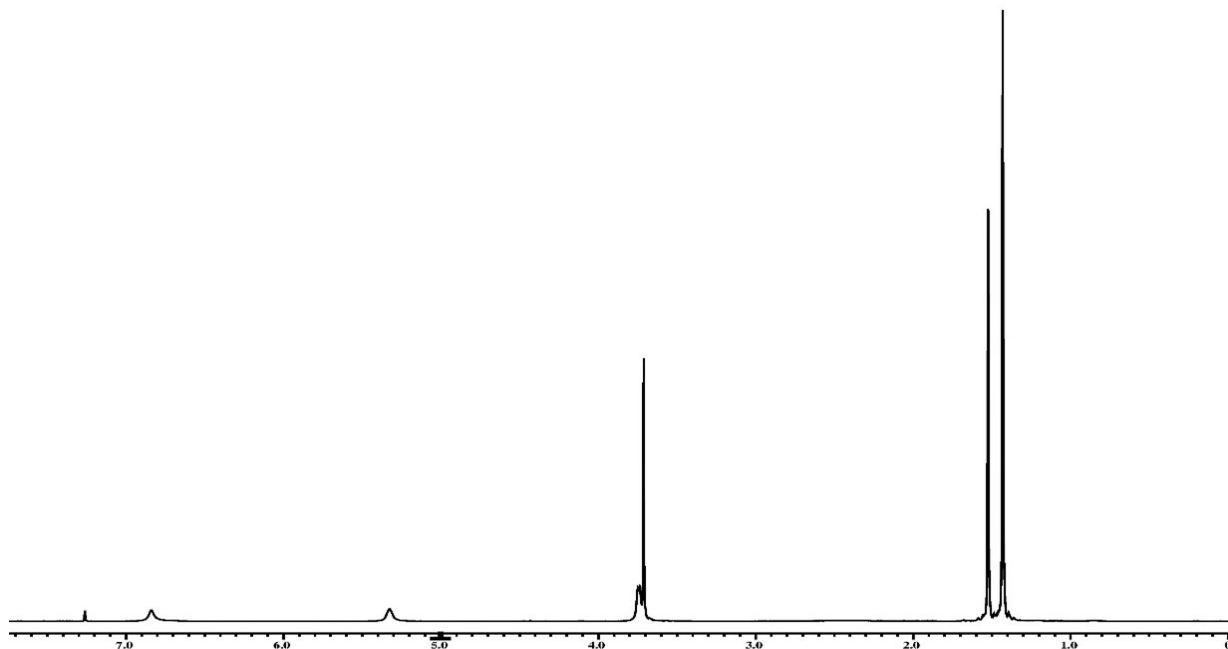

**Fig. S3:**  $^1\text{H}$  NMR (400 MHz,  $\text{CDCl}_3$ ,  $\delta$  in ppm, 298K) spectra of BOC-Gly-Aib-OMe **1**.

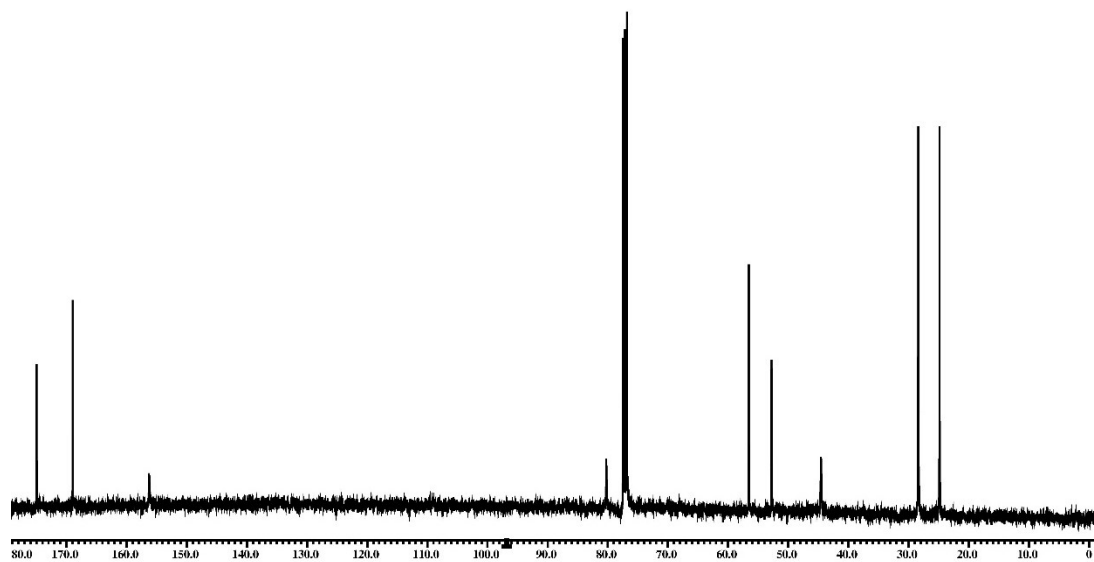

**Fig. S4:**  $^{13}\text{C}$  NMR (100 MHz,  $\text{CDCl}_3$ ,  $\delta$  in ppm, 298K) spectra of BOC-Gly-Aib-OMe **1**.

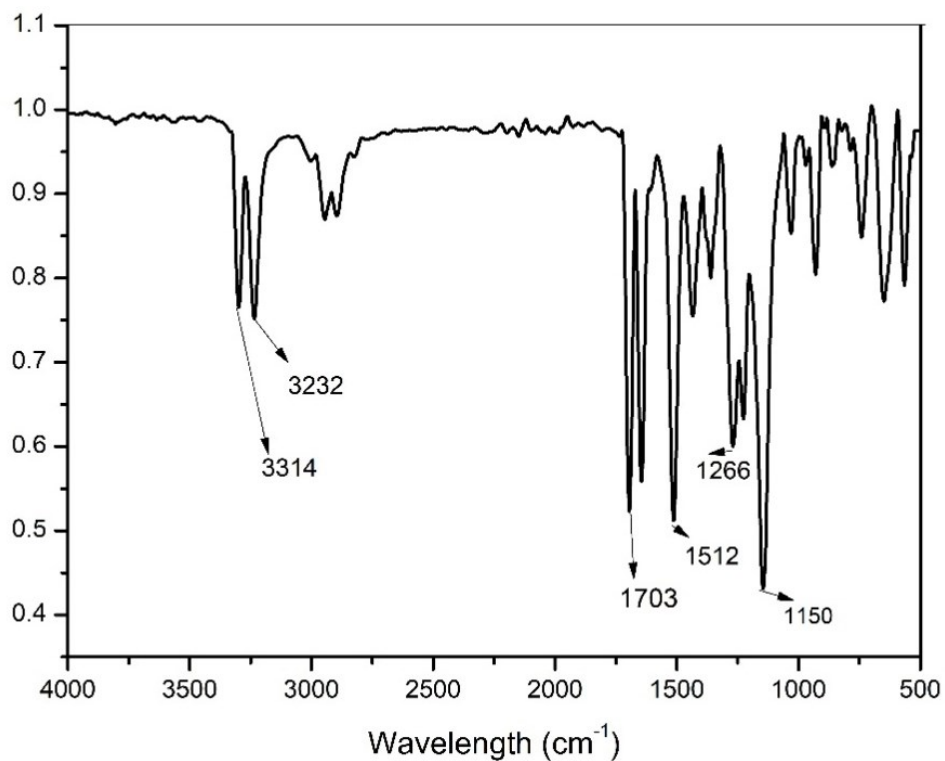

**Fig. S5:** FT-IR spectra of Boc-Gly-Aib-OMe 1.

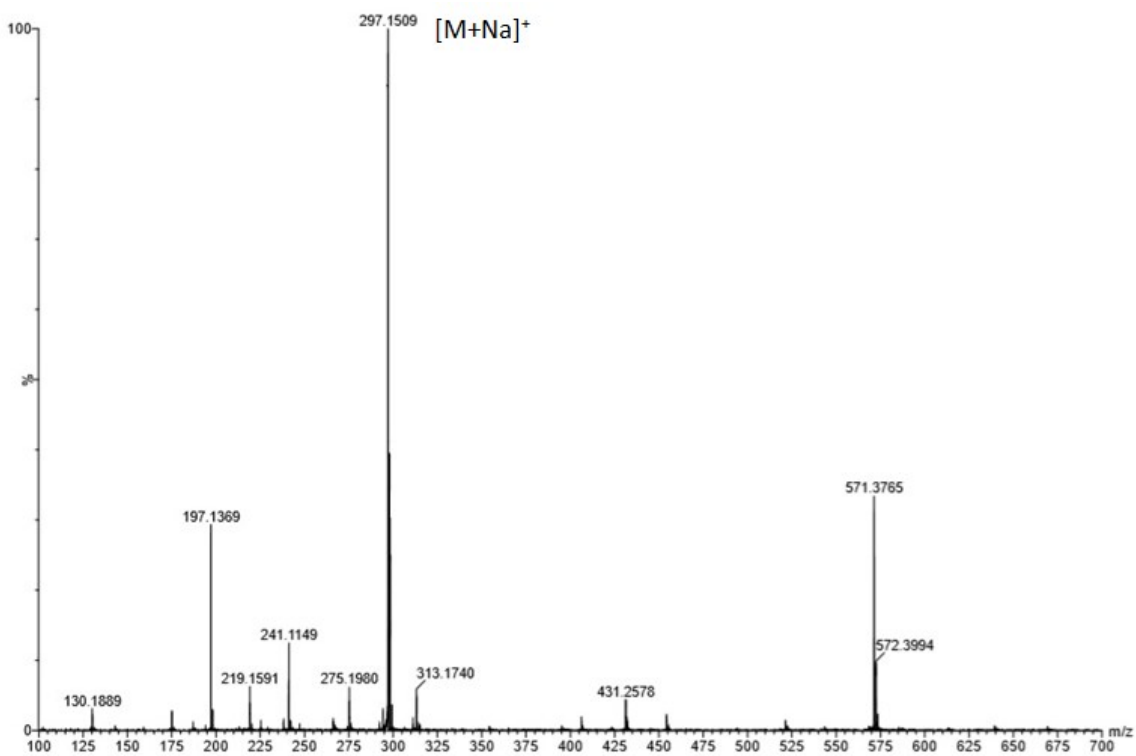

**Fig. S6:** Mass Spectra of Boc-Gly-Aib-OMe 1.

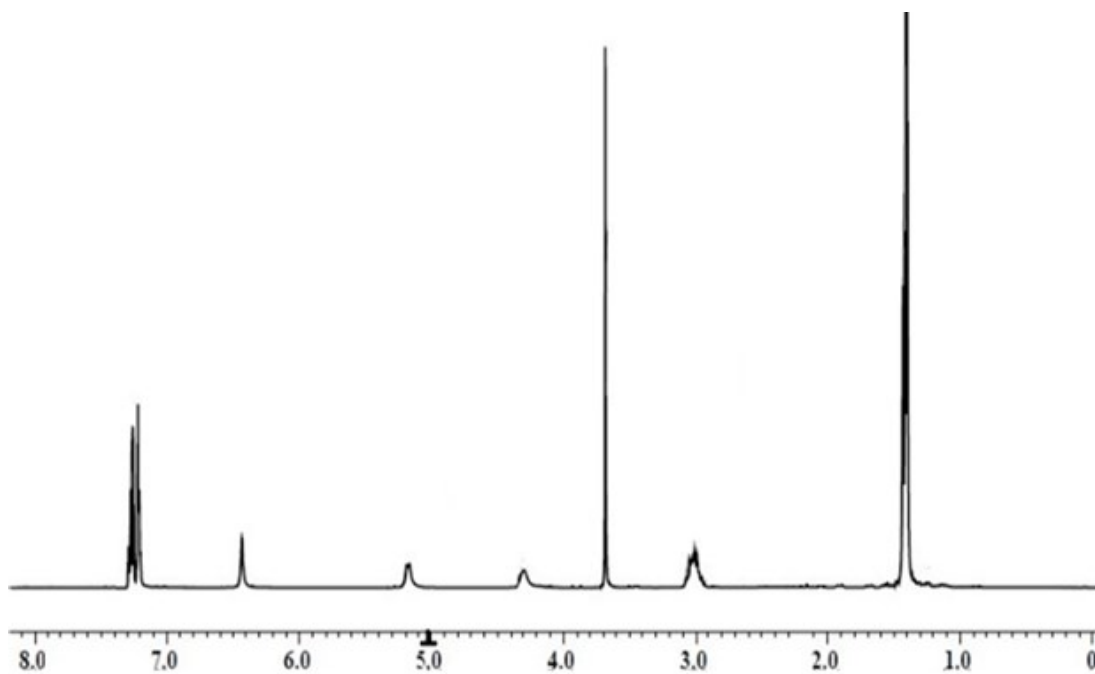

**Fig. S7:**  $^1\text{H}$  NMR (500 MHz,  $\text{CDCl}_3$ ,  $\delta$  in ppm, 298K) spectra Boc-Phe-Aib-OMe **2**.

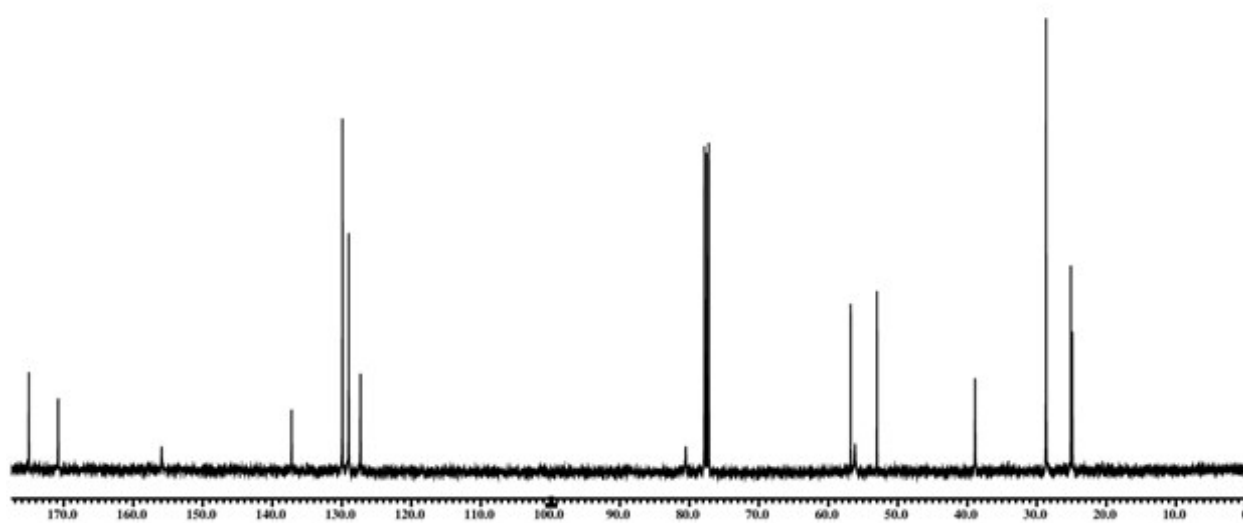

**Fig. S8:**  $^{13}\text{C}$  NMR (125 MHz,  $\text{CDCl}_3$ ,  $\delta$  in ppm, 298K) spectra Boc-Phe-Aib-OMe **2**.

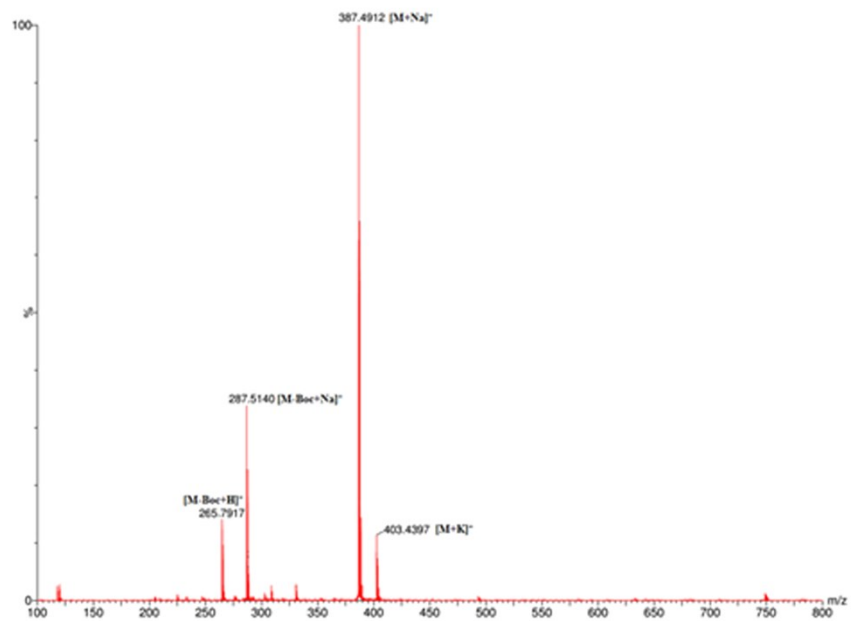

Fig. S9: Mass spectrum of Boc-Phe-Aib-OMe 2.

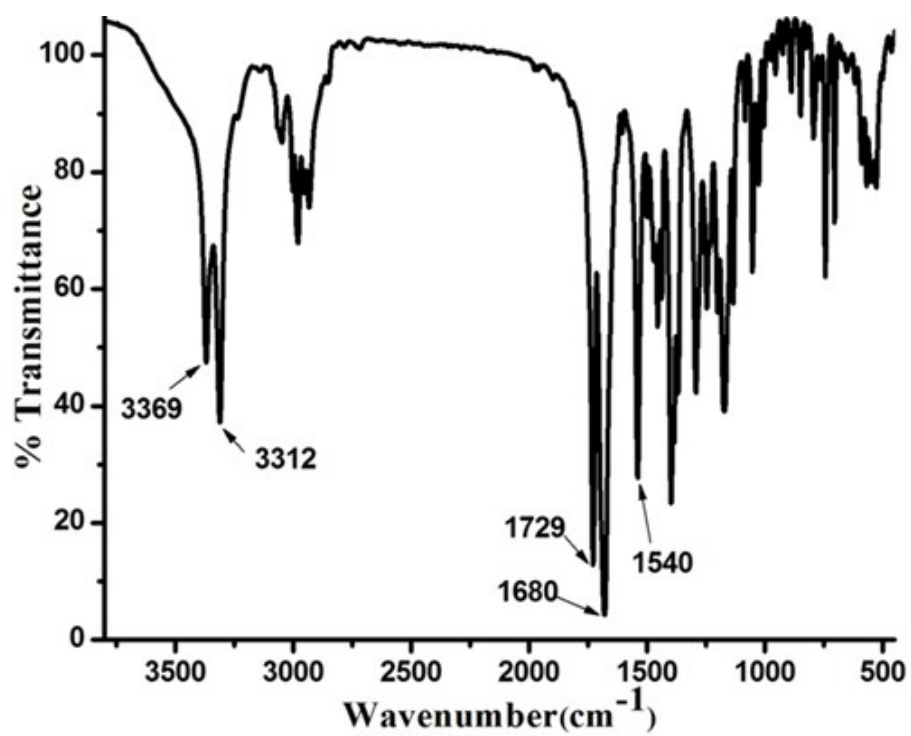

Fig. S10: FT-IR spectrum of Boc-Phe-Aib-OMe 2.

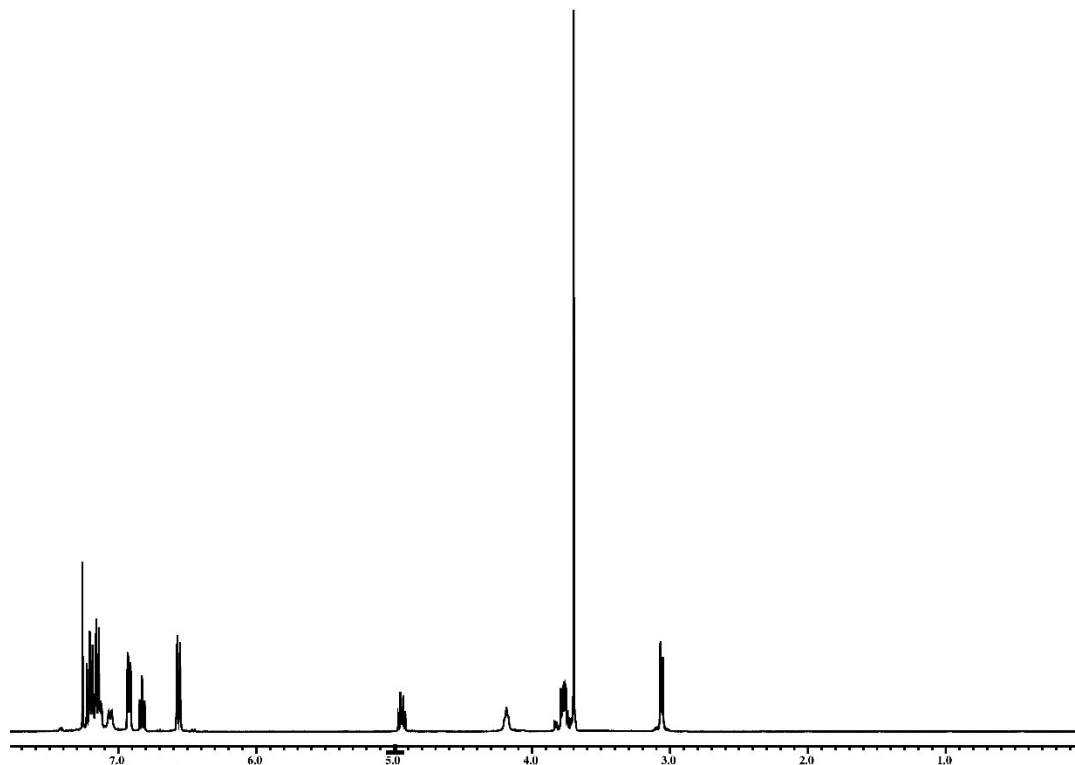

**Fig. S11:**  $^1\text{H}$  NMR (400 MHz,  $\text{CDCl}_3$ ,  $\delta$  ppm) spectra of NPG-Phe-OMe **3**.

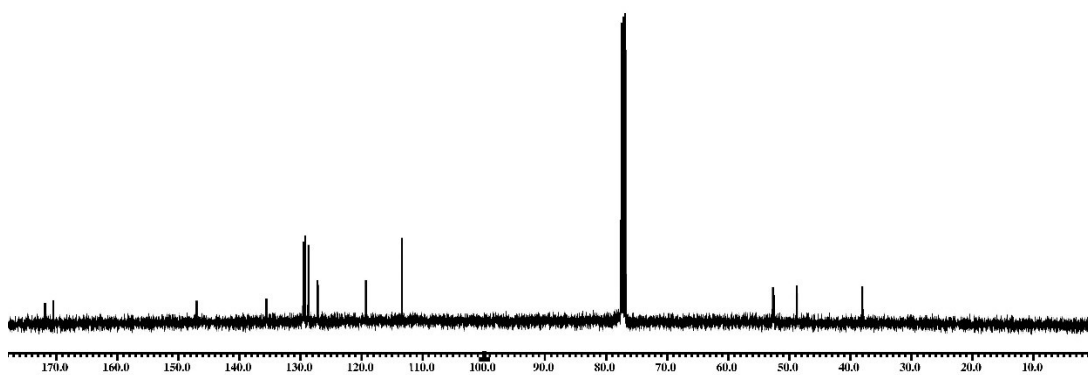

**Fig. S12:**  $^{13}\text{C}$  NMR (100 MHz,  $\text{CDCl}_3$ ,  $\delta$  in ppm, 298K) spectra of NPG-Phe-OMe **3**.



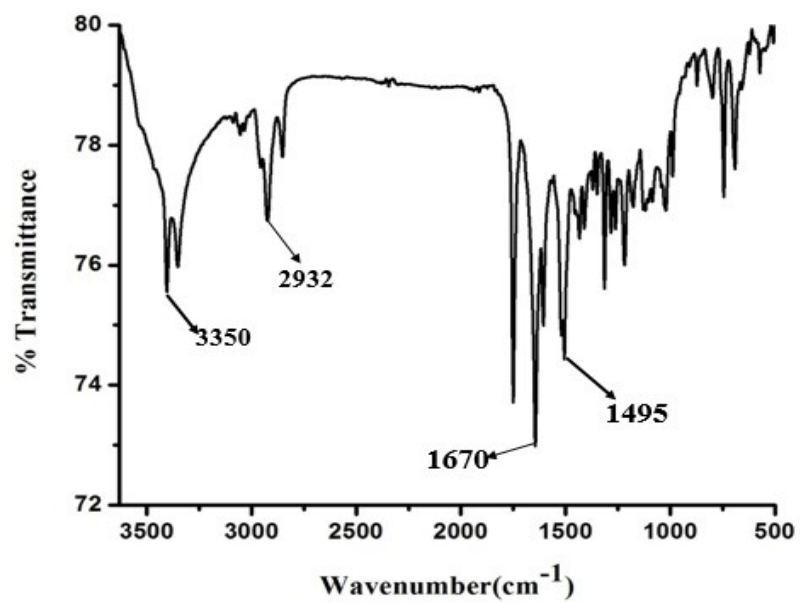

Fig. S13: IR spectra of NPG-Phe-OMe 3.

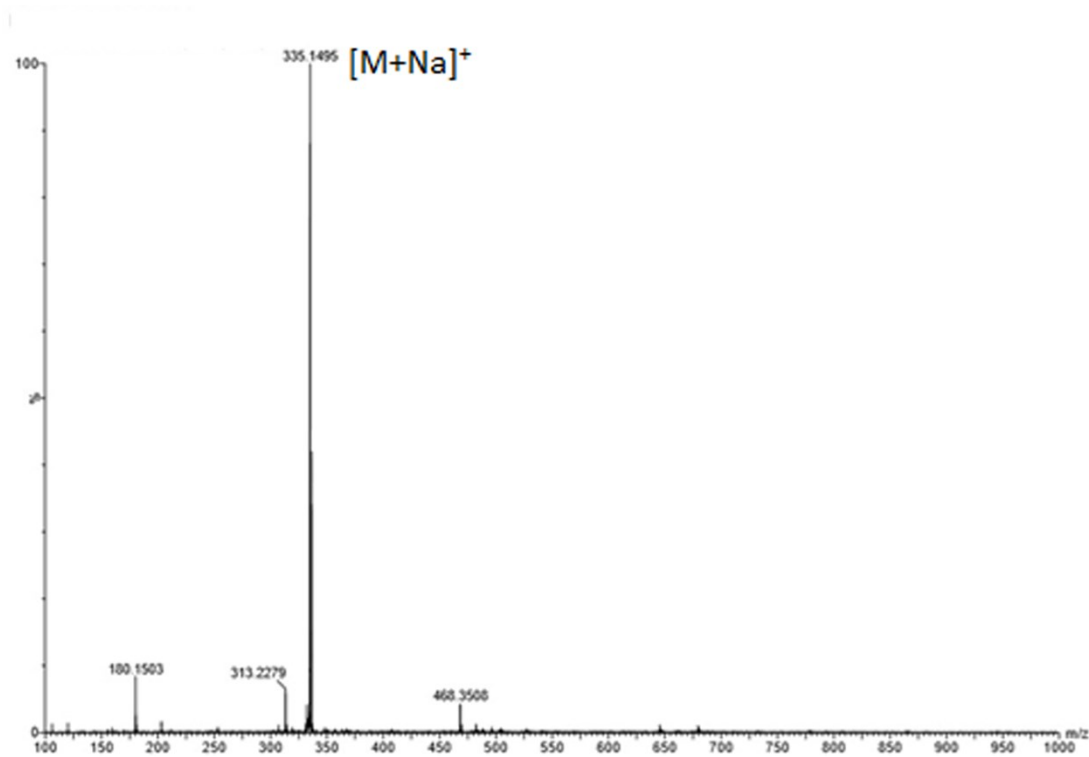

Fig. S14: Mass Spectra of NPG-Phe-OMe 3.

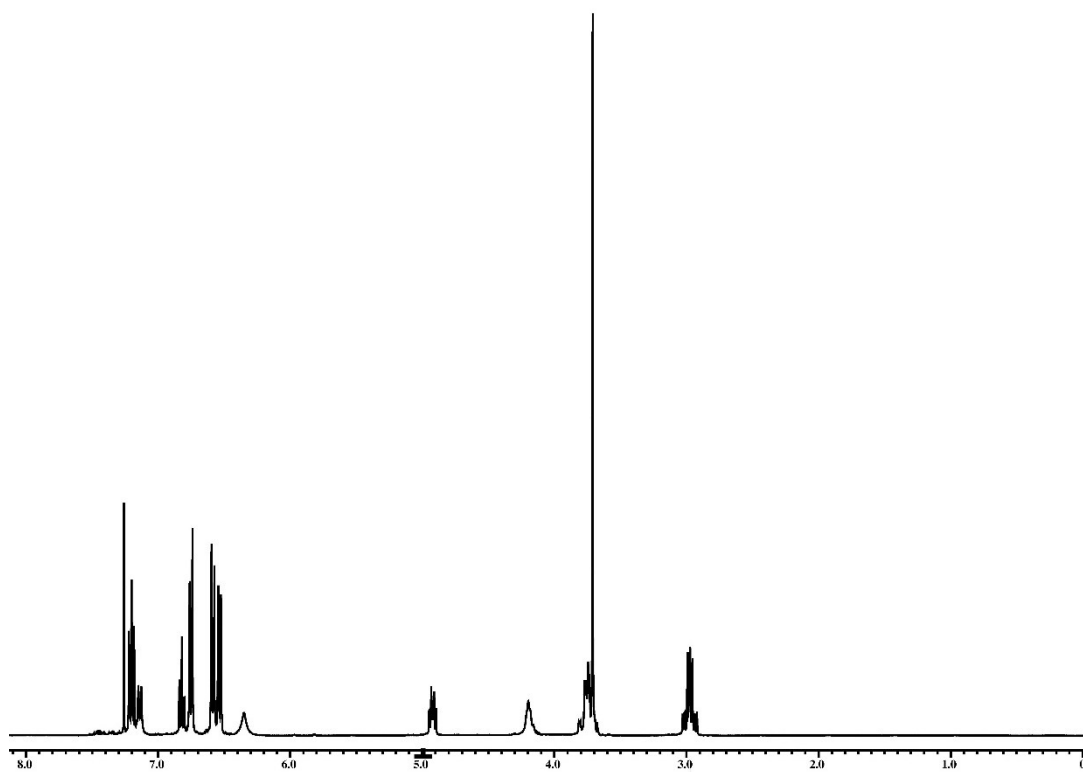

**Fig. S15:**  $^1\text{H}$  NMR (400 MHz,  $\text{CDCl}_3$ ,  $\delta$  in ppm, 298K) spectra of NPG-Tyr-OMe **4**.

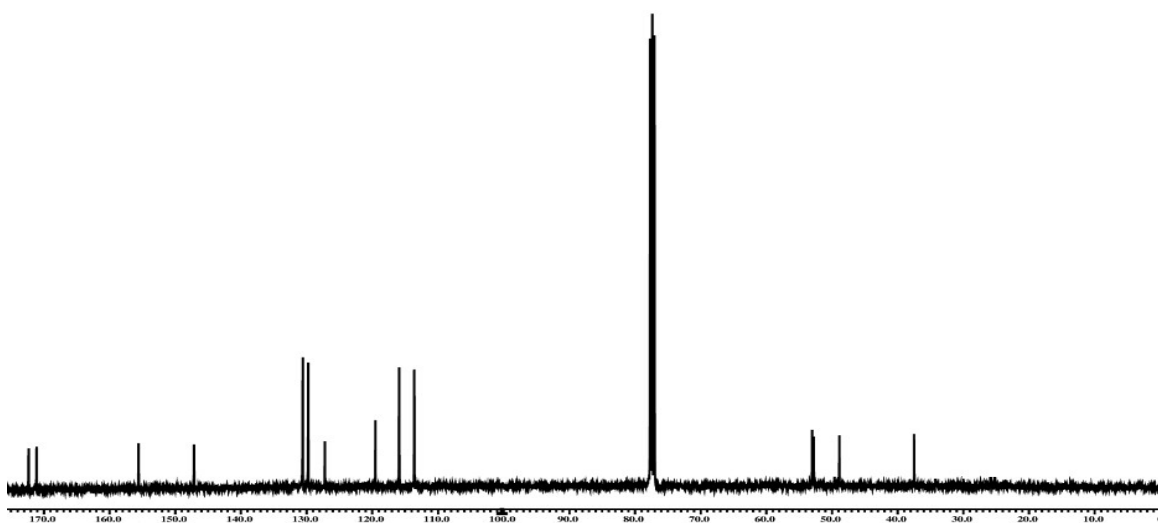

**Fig. S16:**  $^{13}\text{C}$  NMR (100 MHz,  $\text{CDCl}_3$ ,  $\delta$  in ppm, 298K) spectra NPG-Tyr-OMe **4**.

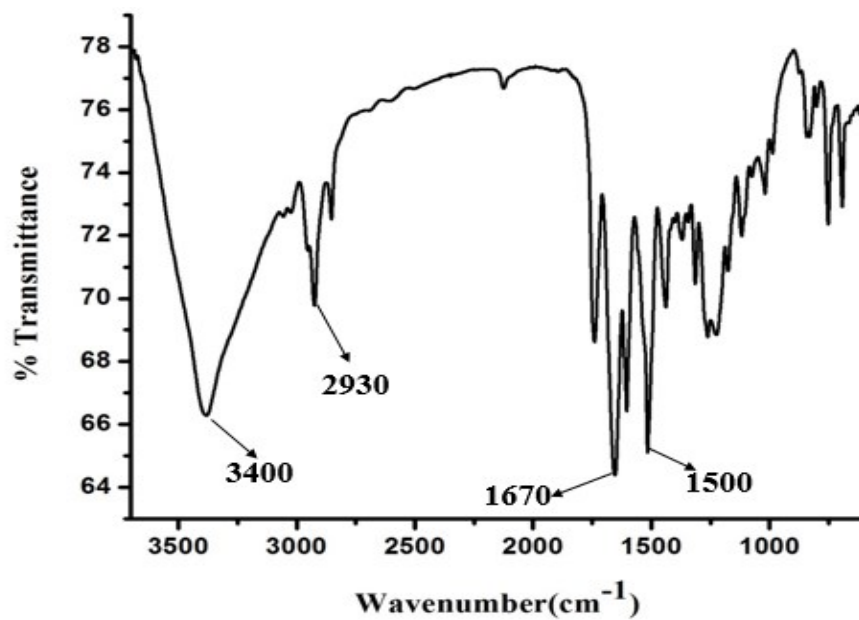

Fig. S17: IR spectra of NPG-Tyr-OMe 4.

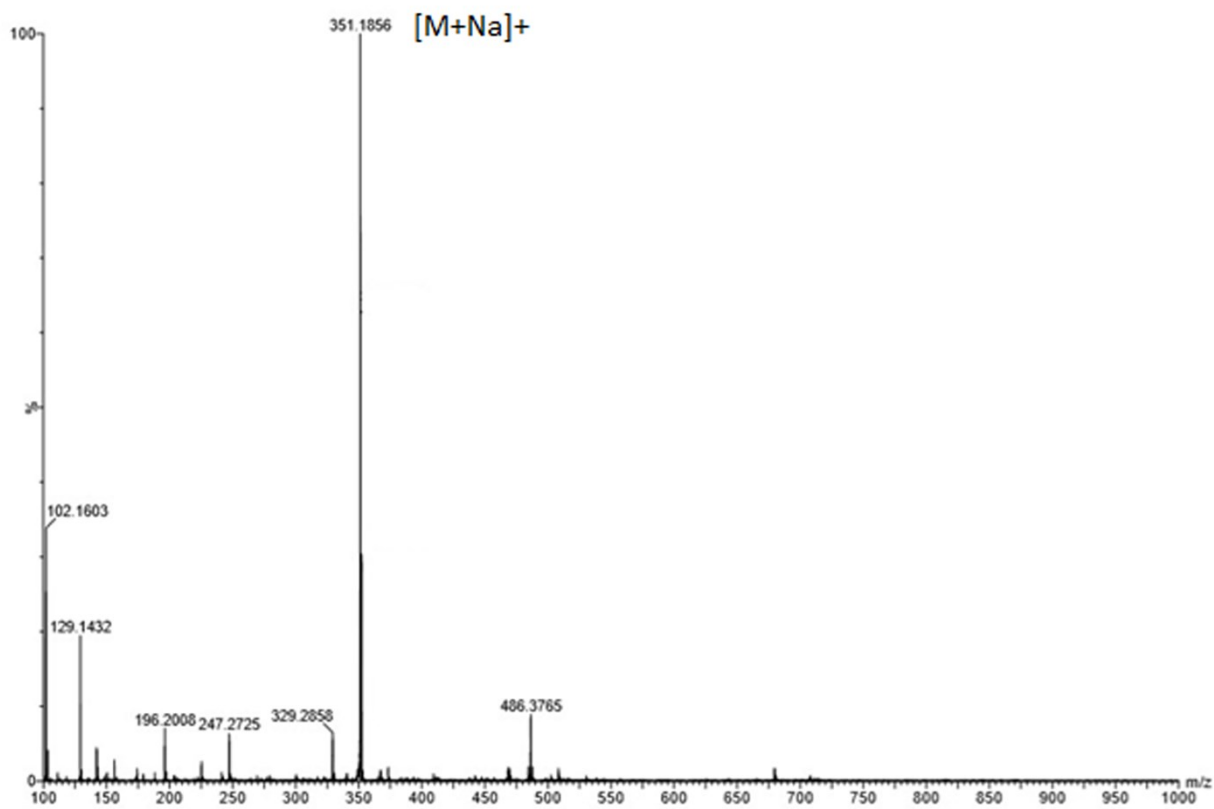

Fig. S18: Mass Spectra of NPG-Tyr-OMe 4.
